# Supplementary material for: SARS-CoV-2 Omicron BA.1 Variant Infection of Human Colon Epithelial Cells
Source: MDPI journal article supplement (doi:10.3390/v16040634), 2024-04-19
Supplement: s1 [file s1]

Supplementary Materials

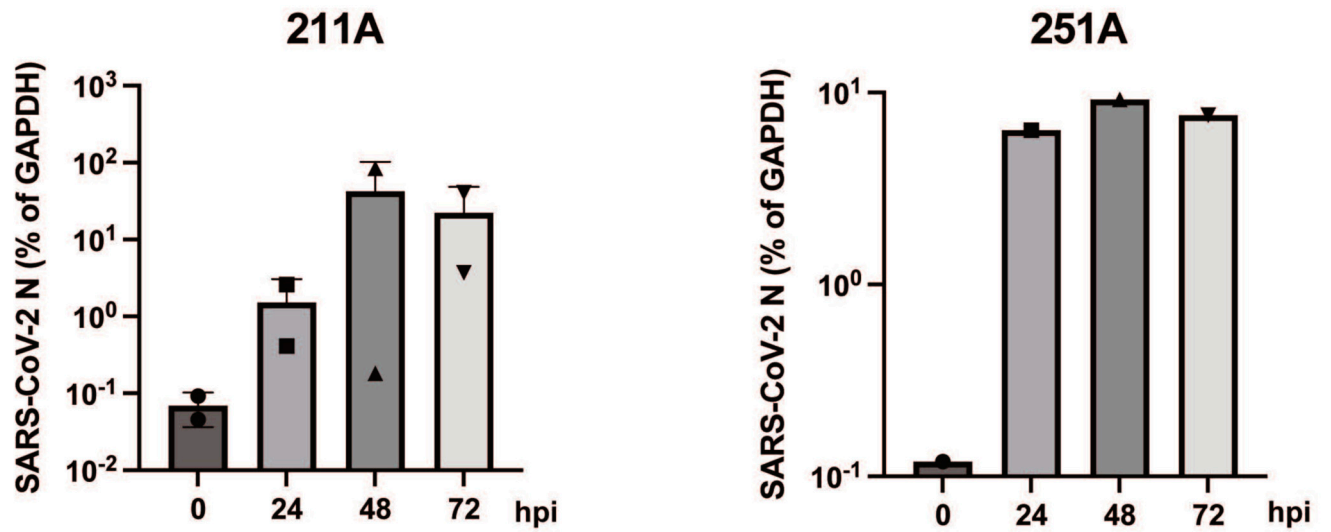

**Supplemental Figure S1. Kinetics of SARS-CoV-2 replication in human colonoids.** Colonoid lines in 2D transwell monolayers derived from two donors were infected with indicated SARS-CoV-2 variants at an MOI of 0.01. RNA was harvested at 24, 48, or 72 hours post infection and SARS-CoV-2 N level was quantified by RT-qPCR and normalized to GAPDH.

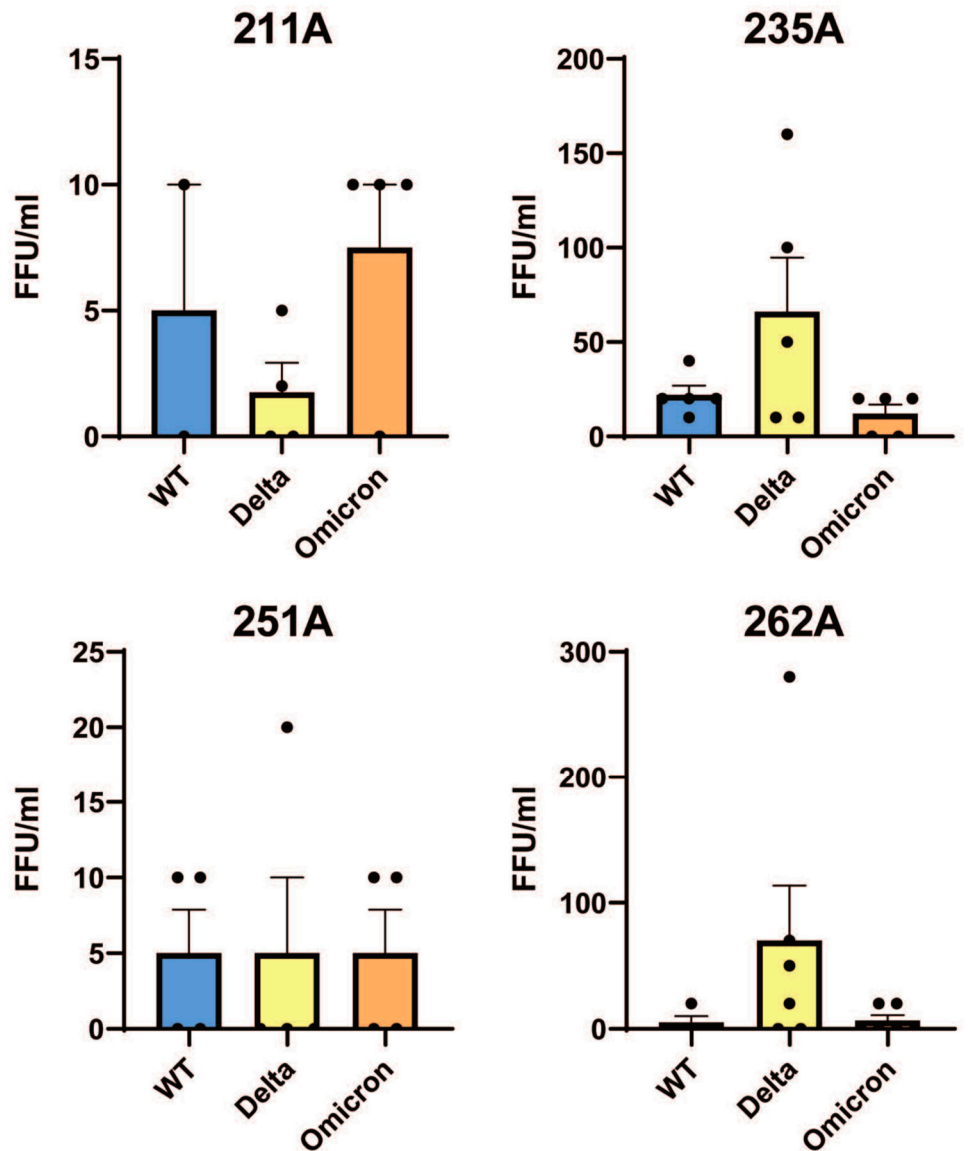

**Supplemental Figure S2. Production of virus progeny from multiple SARS-CoV-2 variants.** Quantification of infectious viral particles in the supernatants collected from the apical compartments of corresponding transwells at 24 hours post infection by a focus forming unit assay.

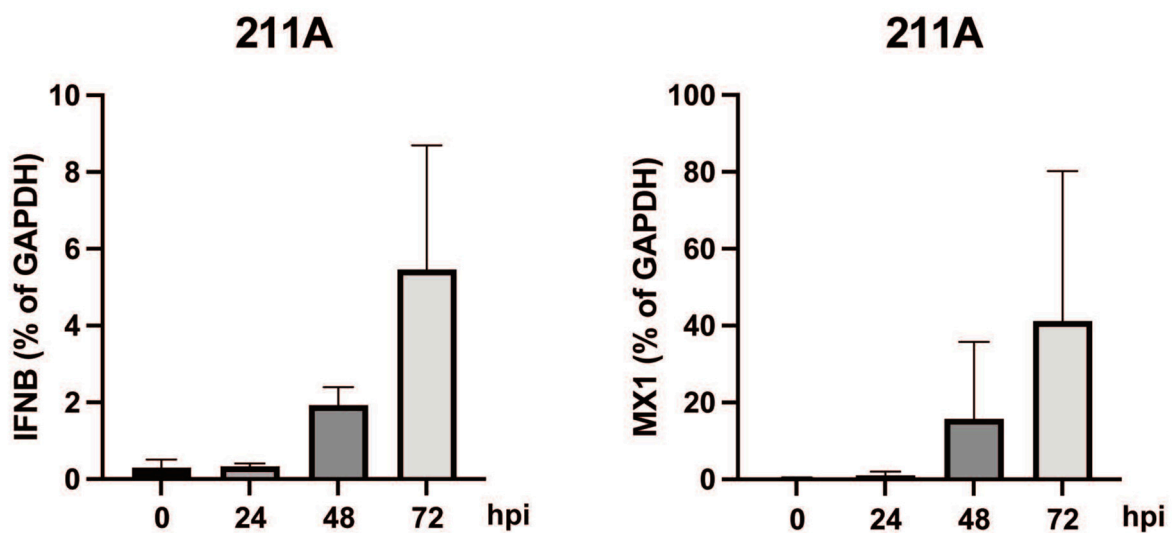

**Supplemental Figure S3. Temporal dynamics of type I IFN expression.** IFNB and MX1 mRNA levels were quantified by RT-qPCR and normalized to GAPDH in colonoids infected with WA1 and harvested at 24, 48, and 72 hours post infection. (Mean with SEM).

**Table S1.** Virus sequencing results: Spike Mutations in SARS-CoV-2 variants sequenced by NovaSeq.

| Omicron B.1.1.529                                                                                                                                                                                                                                   | Delta B.1.617.2                                                                        | WT WA1             |
|-----------------------------------------------------------------------------------------------------------------------------------------------------------------------------------------------------------------------------------------------------|----------------------------------------------------------------------------------------|--------------------|
| T95I, G142D, V143del, Y144del, Y145del, N211I, L212del, G339D, S371L, S373P, S375F, K417N, N440K, G446S, S477N, T478K, E484A, Q493R, G496S, Q498R, N501Y, Y505H, T547K, D614G, H655Y, N679K, P681H, N764K, D796Y, N856K, Q954H, N969K, L981F, D1146 | T19R, G142D, E156G, F157del, R158del, L452R, T478K, D614G, P681R, F855S, D950N, C1235F | No spike mutations |

**Table S2.** qPCR Primers and Probes.

| Primer name  | Sequences                                                                                            |
|--------------|------------------------------------------------------------------------------------------------------|
| SARS-CoV-2 N | Forward: ATGCTGCAATCGTGCTACAA<br>Reverse: GACTGCCGCCTCTGCTC<br>Probe: FAM/TCAAGGAACAACATTGCCAA/TAMRA |
| Human GAPDH  | Forward: GGAGCGAGATCCCTCCAAAAT<br>Reverse: GGCTGTTGTCATACTTCTCATGG                                   |
| IFNL3        | Forward: TAAGAGGGCCAAAGATGCCTT<br>Reverse: CTGGTCCAAGACATCCCCC                                       |
| IFNB         | Forward: ATGACCAACAAGTGTCTCCTCC<br>Reverse: GGAATCCAAGCAAGTTGTAGCTC                                  |
| MX1          | Forward: GTGGCTGAGAACAACCTGTG<br>Reverse: GGCATCTGGTCACGATCCC                                        |

**Disclaimer/Publisher's Note:** The statements, opinions and data contained in all publications are solely those of the individual author(s) and contributor(s) and not of MDPI and/or the editor(s). MDPI and/or the editor(s) disclaim responsibility for any injury to people or property resulting from any ideas, methods, instructions or products referred to in the content.

**Table S3.** Background of the colonoids donors.

| Patient ID | Patient Diagnosis (N = non-IBD/healthy, CD = Crohn's, UC = ulcerative colitis, FAP = Familial) | Center Biopsy Collected At | Intestinal region | Age @ Access | Sex 1=Male 2=Female | Race 1=White 2=Black 3=Asian 4=Hispanic 5=Multiple/Other 6=Native American |  |
|------------|------------------------------------------------------------------------------------------------|----------------------------|-------------------|--------------|---------------------|----------------------------------------------------------------------------|--|
|------------|------------------------------------------------------------------------------------------------|----------------------------|-------------------|--------------|---------------------|----------------------------------------------------------------------------|--|

|      |                        |       |        |    |   |   |  |
|------|------------------------|-------|--------|----|---|---|--|
|      | <b>aden.<br/>Poly.</b> |       |        |    |   |   |  |
| H211 | N                      | WashU | Rectum | 55 | 2 | 2 |  |
| H235 | N                      | WashU | Rectum | 51 | 2 | 2 |  |
| H251 | N                      | WashU | Rectum | 63 | 1 | 1 |  |
| H262 | N                      | WashU | Rectum | 56 | 2 | 1 |  |
